# Supplementary material
Source: MDPI journal article supplement (https://www.mdpi.com/2071-1050/13/12/6767)
Supplement: s1 [file s1]

# The monumental olive trees as biocultural heritage of Mediterranean landscapes: The case study of Sicily

Rosario Schicchi, Claudia Speciale, Filippo Amato, Giuseppe Bazan, Giuseppe Di Noto, Pasquale Marino, Pippo Ricciardo and Anna Geraci

**Table S1.** List of the 367 monumental olive trees sampled in Sicily. The trees are usually named as “Olivo di/del/della” (“Olive of” in Italian = *Olea europaea* var. *europaea*) or Oleastro or Olivastro (*Olea europaea* var. *sylvestris*) followed by the toponyms or the name of owner. In bold the specimens listed in table 1.

| Name                                 | Municipality                   | Province         | Circumference<br>max (m) | Vegetative<br>state* |
|--------------------------------------|--------------------------------|------------------|--------------------------|----------------------|
| Olivi fattoria Agnello (15 trees)    | Agrigento                      | Agrigento        | 5–9.5                    | G                    |
| Olivi gemelli di Bonamorone          | Agrigento                      | Agrigento        | 7.5                      | G                    |
| <b>Olivo del Cinghiale</b>           | <b>Agrigento</b>               | <b>Agrigento</b> | <b>11</b>                | <b>G</b>             |
| Olivo del Tempio della Concordia     | Agrigento                      | Agrigento        | 7.5                      | F                    |
| Olivo del Tempio di Giunone          | Agrigento                      | Agrigento        | 12                       | F                    |
| Olivo della Kolymbethra              | Agrigento                      | Agrigento        | 8                        | G                    |
| Olivo di Drasi                       | Agrigento                      | Agrigento        | 9.3                      | F                    |
| Olivo di Villa Genuardo              | Agrigento                      | Agrigento        | 5.4                      | F                    |
| Olivo di Villa Genuardo spiralato    | Agrigento                      | Agrigento        | 3.65                     | F                    |
| Olivo di Villaggio Mosè              | Agrigento                      | Agrigento        | 5                        | G                    |
| <b>Olivo grande di Bonamorone</b>    | <b>Agrigento</b>               | <b>Agrigento</b> | <b>9.1</b>               | <b>G</b>             |
| Olivo di Cattiva 1                   | Alessandria della Rocca        | Agrigento        | 4.5                      | F                    |
| Olivo di Cattiva 2                   | Alessandria della Rocca        | Agrigento        | 5.5                      | F                    |
| Olivo di Cattiva 3                   | Alessandria della Rocca        | Agrigento        | 5                        | F                    |
| <b>Olivo di Cattiva 4</b>            | <b>Alessandria della Rocca</b> | <b>Agrigento</b> | <b>11.4</b>              | <b>F</b>             |
| Olivo di Caldare 1                   | Aragona                        | Agrigento        | 3.5                      | F                    |
| Olivo di Caldare 2                   | Aragona                        | Agrigento        | 3.7                      | F                    |
| Olivo di Caldare 3                   | Aragona                        | Agrigento        | 5                        | M                    |
| Olivo di Caldare 4                   | Aragona                        | Agrigento        | 5                        | M                    |
| Olivo di Muxarello 1                 | Aragona                        | Agrigento        | 6.3                      | F                    |
| Olivo di Muxarello 2                 | Aragona                        | Agrigento        | 3.6                      | M                    |
| Olivo di Olmo                        | Aragona                        | Agrigento        | 6.5                      | F                    |
| Olivo di Salto Maurici 1             | Aragona                        | Agrigento        | 3.9                      | F                    |
| Olivo di Salto Maurici 2             | Aragona                        | Agrigento        | 3.6                      | F                    |
| Olivi dell’azienda Noto (15 trees)   | Caltabellotta                  | Agrigento        | 6–7.5                    | F                    |
| <b>Olivo di Contonaro-Lavanche 1</b> | <b>Caltabellotta</b>           | <b>Agrigento</b> | <b>7.2</b>               | <b>E</b>             |
| <b>Olivo di Contonaro-Lavanche 2</b> | <b>Caltabellotta</b>           | <b>Agrigento</b> | <b>6.8</b>               | <b>G</b>             |
| Olivo di Noto 1                      | Caltabellotta                  | Agrigento        | 11.6                     | E                    |
| Olivo di Noto 2                      | Caltabellotta                  | Agrigento        | 9.5                      | G                    |
| Olivo di Canalicchio 1               | Lucca Sicula                   | Agrigento        | 6.5                      | F                    |
| Olivo di Canalicchio 2               | Lucca Sicula                   | Agrigento        | 3.5                      | F                    |
| Olivo di Fiume                       | Lucca Sicula                   | Agrigento        | 5.5                      | M                    |
| Olivo di Gurra 1                     | Menfi                          | Agrigento        | 4.1                      | F                    |
| Olivo di Gurra 2                     | Menfi                          | Agrigento        | 3.8                      | F                    |
| Olivo di Gurra 3                     | Menfi                          | Agrigento        | 3.8                      | F                    |
| Olivo di Gurra 4                     | Menfi                          | Agrigento        | 3.5                      | M                    |
| Olivo di Gurra 5                     | Menfi                          | Agrigento        | 4.2                      | F                    |
| Olivo di Gurra 6                     | Menfi                          | Agrigento        | 4.5                      | F                    |
| Olivo di Gurra 7                     | Menfi                          | Agrigento        | 4.5                      | G                    |
| Olivo di Gurra 8                     | Menfi                          | Agrigento        | 4.5                      | F                    |

|                                             |                               |                      |             |          |
|---------------------------------------------|-------------------------------|----------------------|-------------|----------|
| Olivo di Ravidà-Gurra Soprana               | Menfi                         | Agrigento            | 5           | G        |
| <b>Oleastro "Inveges"</b>                   | <b>Sciacca</b>                | <b>Agrigento</b>     | <b>5.2</b>  | <b>E</b> |
| <b>Olivo di Feudo Vassallo</b>              | <b>Sciacca</b>                | <b>Agrigento</b>     | <b>15.2</b> | <b>E</b> |
| <b>Olivo di Fontana Calda 1</b>             | <b>Sciacca</b>                | <b>Agrigento</b>     | <b>17</b>   | <b>E</b> |
| <b>Olivo di Fontana Calda 2</b>             | <b>Sciacca</b>                | <b>Agrigento</b>     | <b>10.5</b> | <b>G</b> |
| Olivo di Siculiana                          | Siculiana                     | Agrigento            | 4           | M        |
| Olivo adiacenze Case Mimiani                | Caltanissetta                 | Caltanissetta        | 5.3         | M        |
| Olivo di Bugini                             | Caltanissetta                 | Caltanissetta        | 5           | F        |
| Olivo di Canalicchio                        | Caltanissetta                 | Caltanissetta        | 6.7         | F        |
| Olivo di Canalotto-Mimiani                  | Caltanissetta                 | Caltanissetta        | 11.4        | G        |
| Olivo di Mimiani 1                          | Caltanissetta                 | Caltanissetta        | 4.5         | M        |
| Olivo di Mimiani 2                          | Caltanissetta                 | Caltanissetta        | 4.7         | F        |
| Olivo di Mimiani 3                          | Caltanissetta                 | Caltanissetta        | 8.1         | F        |
| Olivo di Mimiani 4                          | Caltanissetta                 | Caltanissetta        | 10          | G        |
| Olivo di Monte Conca                        | Caltanissetta                 | Caltanissetta        | 5           | F        |
| Olivo di Pilacane                           | Niscemi                       | Caltanissetta        | 4.7         | F        |
| Olivo di Vituso 1                           | Niscemi                       | Caltanissetta        | 3.6         | F        |
| <b>Olivo di Vituso 2</b>                    | <b>Niscemi</b>                | <b>Caltanissetta</b> | <b>7.2</b>  | <b>F</b> |
| Olivo di Vituso 3                           | Niscemi                       | Caltanissetta        | 3.7         | F        |
| Olivo di Pasteria                           | Calatabiano                   | Catania              | 2.3         | M        |
| <b>Olivo della Madonna del Piano</b>        | <b>Grammichele</b>            | <b>Catania</b>       | <b>6</b>    | <b>F</b> |
| Olivo di Canseria 1                         | Licodia Eubea                 | Catania              | 8.2         | F        |
| Olivo di Canseria 2                         | Licodia Eubea                 | Catania              | 7.6         | F        |
| Olivo di Canseria 3                         | Licodia Eubea                 | Catania              | 6.7         | F        |
| Olivo di Canseria 4                         | Licodia Eubea                 | Catania              | 6.6         | M        |
| <b>Olivo di Piraino</b>                     | <b>Licodia Eubea</b>          | <b>Catania</b>       | <b>7.5</b>  | <b>G</b> |
| Olivo di Sieli                              | Motta Sant'Anastasia          | Catania              | 4.15        | M        |
| <b>Olivo di via dell'olivo Millenario 1</b> | <b>Motta Sant'Anastasia</b>   | <b>Catania</b>       | <b>8</b>    | <b>E</b> |
| Olivo di via dell'olivo Millenario 2        | Motta Sant'Anastasia          | Catania              | 5.7         | G        |
| Olivo di via dell'olivo Millenario 3        | Motta Sant'Anastasia          | Catania              | 4           | F        |
| Olivo di via dell'olivo Millenario 4        | Motta Sant'Anastasia          | Catania              | 4.6         | F        |
| <b>Olivo di via dell'olivo Millenario 5</b> | <b>Motta Sant'Anastasia</b>   | <b>Catania</b>       | <b>7.6</b>  | <b>G</b> |
| Olivo di via dell'olivo Millenario 6        | Motta Sant'Anastasia          | Catania              | 6.2         | G        |
| Olivo di via dell'olivo Millenario 7        | Motta Sant'Anastasia          | Catania              | 5.1         | F        |
| Olivo di Archi                              | Riposto                       | Catania              | 2.7         | M        |
| Olivo di Mandorle                           | Riposto                       | Catania              | 3           | F        |
| <b>Olivo di Santa Maria di Licodia</b>      | <b>Santa Maria di Licodia</b> | <b>Catania</b>       | <b>7.5</b>  | <b>M</b> |
| Olivo di Scannacavoli 1                     | Santa Maria di Licodia        | Catania              | 6.5         | E        |
| Olivo di Scannacavoli 2                     | Santa Maria di Licodia        | Catania              | 5.4         | F        |
| Olivo di Calcarazzo                         | Agira                         | Enna                 | 4.5         | M        |
| Olivo di Farracchione                       | Calascibetta                  | Enna                 | 4.3         | F        |
| <b>Olivo di Nicoletta</b>                   | <b>Enna</b>                   | <b>Enna</b>          | <b>7.8</b>  | <b>G</b> |
| Olivo Secolare di Enna                      | Enna                          | Enna                 | 7           | G        |
| <b>Olivo di Rastello</b>                    | <b>Pietraperzia</b>           | <b>Enna</b>          | <b>6.7</b>  | <b>G</b> |
| Olivo di Satanà 1                           | Pietraperzia                  | Enna                 | 5.3         | F        |
| Olivo di Satanà 2                           | Pietraperzia                  | Enna                 | 5.1         | F        |
| Olivo di Satanà 3                           | Pietraperzia                  | Enna                 | 6.6         | F        |
| Olivo Secolare di Pietraperzia              | Pietraperzia                  | Enna                 | 4.3         | F        |
| Olivo di Liso                               | Troina                        | Enna                 | 4           | G        |
| Olivo di Ordine                             | Troina                        | Enna                 | 14.1        | F        |
| Olivo di Piana San Michele                  | Troina                        | Enna                 | 3.4         | P        |
| Olivo di Sotto Badie                        | Troina                        | Enna                 | 4           | P        |
| <b>Olivo Secolare di Troina 1</b>           | <b>Troina</b>                 | <b>Enna</b>          | <b>12.1</b> | <b>F</b> |

|                                      |                         |                |             |          |
|--------------------------------------|-------------------------|----------------|-------------|----------|
| Olivo Secolare di Troina 2           | Troina                  | Enna           | 9           | F        |
| Olivo Secolare di Troina 3           | Troina                  | Enna           | 6.8         | G        |
| <b>Olivi di Acquedolci (7 trees)</b> | <b>Acquedolci</b>       | <b>Messina</b> | <b>6–9</b>  | <b>F</b> |
| <b>Olivo di Santa Tecla</b>          | <b>Capri Leone</b>      | <b>Messina</b> | <b>8.2</b>  | <b>M</b> |
| <b>Olivo di Predica 1</b>            | <b>Caronia</b>          | <b>Messina</b> | <b>12.9</b> | <b>G</b> |
| Olivo di Predica 2                   | Caronia                 | Messina        | 9.9         | G        |
| Olivo di Predica 3                   | Caronia                 | Messina        | 8.1         | F        |
| Olivo di Predica 4                   | Caronia                 | Messina        | 6.6         | F        |
| Olivo di Fosse                       | Ficarra                 | Messina        | 8           | F        |
| Olivo di Molinazzo 1                 | Ficarra                 | Messina        | 5.7         | F        |
| Olivo di Molinazzo 2                 | Ficarra                 | Messina        | 9           | F        |
| Olivo di Molinazzo 3                 | Ficarra                 | Messina        | 5           | P        |
| Olivo di Molinazzo 4                 | Ficarra                 | Messina        | 6           | M        |
| Olivo di Timpi 1                     | Ficarra                 | Messina        | 6           | M        |
| Olivo di Timpi 2                     | Ficarra                 | Messina        | 4.5         | F        |
| Olivo di Timpi 3                     | Ficarra                 | Messina        | 5.8         | F        |
| Olivo di Canneto Sottano             | Mistretta               | Messina        | 6.4         | F        |
| Olivo di Cozzofodi 1                 | Mistretta               | Messina        | 9.5         | F        |
| Olivo di Cozzofodi 2                 | Mistretta               | Messina        | 7.4         | F        |
| Olivo di Finaita 1                   | Motta Camastra          | Messina        | 4.4         | M        |
| Olivo di Finaita 2                   | Motta Camastra          | Messina        | 4.3         | M        |
| Olivo di San Cataldo                 | Motta Camastra          | Messina        | 5.2         | F        |
| Olivo di Giardino                    | Motta d'Affermo         | Messina        | 6.7         | F        |
| Olivo di Sant'Anna                   | Motta d'Affermo         | Messina        | 15          | F        |
| Olivo di Umbria                      | Naso                    | Messina        | 6.2         | F        |
| Olivo di Panecastro                  | Patti                   | Messina        | 5           | M        |
| Olivastro del Brigante Cortese       | Pettineo                | Messina        | 6           | P        |
| Olivo di Catena 1                    | Pettineo                | Messina        | 5.7         | F        |
| Olivo di Catena 2                    | Pettineo                | Messina        | 4.9         | F        |
| Olivo di Comate                      | Pettineo                | Messina        | 5.5         | F        |
| <b>Olivo di Fontecà</b>              | <b>Pettineo</b>         | <b>Messina</b> | <b>7.4</b>  | <b>P</b> |
| <b>Olivo di Innari 1</b>             | <b>Pettineo</b>         | <b>Messina</b> | <b>19.6</b> | <b>G</b> |
| Olivo di Innari 2                    | Pettineo                | Messina        | 4.5         | F        |
| <b>Olivo di Maviti</b>               | <b>Pettineo</b>         | <b>Messina</b> | <b>10.8</b> | <b>E</b> |
| Olivo di Porta 1                     | Pettineo                | Messina        | 6.2         | F        |
| Olivo di Porta 2                     | Pettineo                | Messina        | 7.1         | F        |
| Olivo di Porta 3                     | Pettineo                | Messina        | 7.1         | F        |
| Olivo di Porta Bosco 1               | Pettineo                | Messina        | 5.9         | G        |
| Olivo di Porta Bosco 2               | Pettineo                | Messina        | 5.6         | G        |
| Olivo di Terrata                     | Pettineo                | Messina        | 6.2         | F        |
| Olivo di Vina                        | Pettineo                | Messina        | 6.6         | F        |
| Olivo di Zanissa                     | Pettineo                | Messina        | 8.5         | G        |
| Olivo di Colonna 1                   | Reitano                 | Messina        | 6.7         | F        |
| Olivo di Colonna 2                   | Reitano                 | Messina        | 10.5        | G        |
| Olivo di Iacona                      | Reitano                 | Messina        | 4           | F        |
| Olivo di Lavanda-Ucciardo 1          | Reitano                 | Messina        | 7.6         | F        |
| Olivo di Lavanda-Ucciardo 2          | Reitano                 | Messina        | 9.3         | F        |
| Olivo di San Simone 1                | Reitano                 | Messina        | 7           | G        |
| Olivo di San Simone 2                | Reitano                 | Messina        | 6           | M        |
| Olivo di Vignale 1                   | Reitano                 | Messina        | 4.6         | M        |
| Olivo di Vignale 2                   | Reitano                 | Messina        | 5.2         | F        |
| <b>Olivo di Sugherazzo</b>           | <b>San Fratello</b>     | <b>Messina</b> | <b>7.4</b>  | <b>F</b> |
| Olivo di Contura                     | Sant'Agata di Militello | Messina        | 7.1         | G        |

|                                           |                           |                |             |          |
|-------------------------------------------|---------------------------|----------------|-------------|----------|
| Olivo di Gabbella                         | Sant'Agata di Militello   | Messina        | 4.9         | P        |
| Olivo di Giancola                         | Sant'Agata di Militello   | Messina        | 7.3         | G        |
| Olivo di Pattina                          | Sant'Agata di Militello   | Messina        | 5.9         | F        |
| Olivo di Badie                            | Santo Stefano di Camastra | Messina        | 7           | F        |
| Olivo di Santa Venere                     | Santo Stefano di Camastra | Messina        | 8.5         | G        |
| Olivo di Contura (Serro Coniglio)         | Torrenova                 | Messina        | 3.9         | M        |
| Olivo di Buongiorno                       | Tusa                      | Messina        | 7.1         | F        |
| Olivo di Canale                           | Tusa                      | Messina        | 5.8         | F        |
| Olivo di Chiuddia                         | Tusa                      | Messina        | 11.6        | G        |
| Olivo di Ciampoli 1                       | Tusa                      | Messina        | 6.3         | G        |
| Olivo di Ciampoli 2                       | Tusa                      | Messina        | 5.2         | M        |
| Olivo di Ciampoli 3                       | Tusa                      | Messina        | 17.5        | F        |
| Olivo di San Cataldo                      | Tusa                      | Messina        | 6           | F        |
| Olivo di Serra Bruno                      | Tusa                      | Messina        | 6.9         | G        |
| <b>Olivo di Tardara</b>                   | <b>Tusa</b>               | <b>Messina</b> | <b>7.4</b>  | <b>G</b> |
| Olivo di Zimmari                          | Tusa                      | Messina        | 8.9         | M        |
| Olivi di contrada Patellaro (5 trees)     | Bolognetta                | Palermo        | 6–7.7       | F        |
| Olivo di Gurgo-Frana                      | Caccamo                   | Palermo        | 4.7         | M        |
| <b>Olivo di Monaci</b>                    | <b>Caccamo</b>            | <b>Palermo</b> | <b>6.5</b>  | <b>F</b> |
| Olivo della Chiusa                        | Caltavuturo               | Palermo        | 6.9         | F        |
| Olivo di Caltavuturo 2                    | Caltavuturo               | Palermo        | 6           | M        |
| Olivo di Caltavuturo 3                    | Caltavuturo               | Palermo        | 5.5         | M        |
| <b>Olivo di Centunzi</b>                  | <b>Caltavuturo</b>        | <b>Palermo</b> | <b>9.1</b>  | <b>G</b> |
| Olivi di Campofelice (3 trees)            | Campofelice di Roccella   | Palermo        | 4.5–5.5     | F        |
| Olivi della Contemplazione (6 trees)      | Carini                    | Palermo        | 4.5–7       | F        |
| <b>Olivo della Contemplazione</b>         | <b>Carini</b>             | <b>Palermo</b> | <b>12.7</b> | <b>G</b> |
| Olivo di Manostalla                       | Carini                    | Palermo        | 13.5        | F        |
| Olivo di Castelbuono                      | Castelbuono               | Palermo        | 5           | E        |
| Olivo del Sosio                           | Chiusa Sclafani           | Palermo        | 6.4         | F        |
| Olivo di Valle Vite                       | Chiusa Sclafani           | Palermo        | 4.4         | P        |
| Olivo della Kulia 1                       | Isnello                   | Palermo        | 7.5         | F        |
| Olivo della Kulia 2                       | Isnello                   | Palermo        | 5.5         | F        |
| Olivo della Kulia 3                       | Isnello                   | Palermo        | 5           | F        |
| Olivo delle Meraviglie                    | Isnello                   | Palermo        | 9.5         | F        |
| Olivo di Orlando 1                        | Mezzojuso                 | Palermo        | 8.4         | M        |
| Olivo di Orlando 2                        | Mezzojuso                 | Palermo        | 9.8         | F        |
| Olivo di Orlando 3                        | Mezzojuso                 | Palermo        | 11.6        | F        |
| Olivo di Orlando 4                        | Mezzojuso                 | Palermo        | 9.5         | G        |
| <b>Olivo di Misilmeri</b>                 | <b>Misilmeri</b>          | <b>Palermo</b> | <b>9.5</b>  | <b>E</b> |
| Olivo di Cozzo Bidera 1                   | Palazzo Adriano           | Palermo        | 7.2         | F        |
| Olivo di Cozzo Bidera 2                   | Palazzo Adriano           | Palermo        | 8.4         | G        |
| Olivo di Cozzo Bidera 4                   | Palazzo Adriano           | Palermo        | 5.8         | G        |
| <b>Olivo di Pullicia di Sopra</b>         | <b>Palazzo Adriano</b>    | <b>Palermo</b> | <b>10.1</b> | <b>G</b> |
| <b>Il Patriarca della Favorita</b>        | <b>Palermo</b>            | <b>Palermo</b> | <b>11.1</b> | <b>G</b> |
| Olivo Assessorato Territorio e Ambiente 1 | Palermo                   | Palermo        | 10.3        | F        |
| Olivo Assessorato Territorio e Ambiente 2 | Palermo                   | Palermo        | 10.3        | F        |
| Olivo di Sant'Antonio                     | Palermo                   | Palermo        | 11.2        | M        |
| Olivo di Celsito 1                        | Pollina                   | Palermo        | 5.5         | F        |
| Olivo di Celsito 2                        | Pollina                   | Palermo        | 4.3         | G        |
| Olivo di Celsito 3                        | Pollina                   | Palermo        | 5.6         | G        |
| Olivo di Celsito 4                        | Pollina                   | Palermo        | 8.7         | F        |
| Olivo di Celsito 5                        | Pollina                   | Palermo        | 7.5         | M        |
| Olivo di Cozzo Bidera 3                   | Pollina                   | Palermo        | 7           | F        |

|                                    |                              |                 |             |          |
|------------------------------------|------------------------------|-----------------|-------------|----------|
| Olivo Arcuato                      | San Mauro Castelverde        | Palermo         | 3.5         | M        |
| <b>Olivo di Calabro'</b>           | <b>San Mauro Castelverde</b> | <b>Palermo</b>  | <b>18</b>   | <b>E</b> |
| Olivo di Ogliastro 1               | San Mauro Castelverde        | Palermo         | 6.9         | M        |
| Olivo di Ogliastro 2               | San Mauro Castelverde        | Palermo         | 10.5        | F        |
| Olivo di Scala Larrone 1           | San Mauro Castelverde        | Palermo         | 5.3         | G        |
| Olivo di Scala Larrone 2           | San Mauro Castelverde        | Palermo         | 10.3        | E        |
| Olivo di Ellera 1                  | Ventimiglia di Sicilia       | Palermo         | 9.5         | F        |
| Olivo di Ellera 2                  | Ventimiglia di Sicilia       | Palermo         | 10.5        | F        |
| Olivo di Ellera 3                  | Ventimiglia di Sicilia       | Palermo         | 9.5         | F        |
| Olivo di Comurre                   | Vicari                       | Palermo         | 3.5         | M        |
| Olivo di Vallefonda 1              | Vicari                       | Palermo         | 7.1         | F        |
| Olivo di Vallefonda 2              | Vicari                       | Palermo         | 6.3         | M        |
| Olivo di Vallefonda 3              | Vicari                       | Palermo         | 13          | F        |
| <b>Olivo di Vallefonda 4</b>       | <b>Vicari</b>                | <b>Palermo</b>  | <b>19</b>   | <b>G</b> |
| Olivo di Vallefonda 5              | Vicari                       | Palermo         | 6.2         | G        |
| Olivo di Vallefonda 6              | Vicari                       | Palermo         | 15          | P        |
| <b>Olivo di Lippia</b>             | <b>Acate</b>                 | <b>Ragusa</b>   | <b>10.3</b> | <b>E</b> |
| Olivo di Lippia                    | Acate                        | Ragusa          | 9.5         | E        |
| Olivo di Morana                    | Chiaramonte Gulfi            | Ragusa          | 3.5         | F        |
| Olivo di Morso Pretepaolo 1        | Chiaramonte Gulfi            | Ragusa          | 3           | M        |
| Olivo di Morso Pretepaolo 2        | Chiaramonte Gulfi            | Ragusa          | 2.5         | M        |
| Olivo di Muti 1                    | Chiaramonte Gulfi            | Ragusa          | 5.7         | F        |
| Olivo di Muti 2                    | Chiaramonte Gulfi            | Ragusa          | 7.4         | M        |
| Olivo di Muti 3                    | Chiaramonte Gulfi            | Ragusa          | 10          | G        |
| <b>Olivo di Muti 4</b>             | <b>Chiaramonte Gulfi</b>     | <b>Ragusa</b>   | <b>10.5</b> | <b>G</b> |
| Olivo di Scornavacche              | Chiaramonte Gulfi            | Ragusa          | 8.1         | F        |
| Olivo di Scornavacche              | Chiaramonte Gulfi            | Ragusa          | 3.2         | M        |
| Olivo di Scorsone 1                | Ispica                       | Ragusa          | 3.6         | F        |
| Olivo di Scorsone 2                | Ispica                       | Ragusa          | 5.2         | M        |
| <b>Olivo di Scorsone 3</b>         | <b>Ispica</b>                | <b>Ragusa</b>   | <b>10.5</b> | <b>F</b> |
| <b>Olivo di Palazzelli</b>         | <b>Modica</b>                | <b>Ragusa</b>   | <b>15.1</b> | <b>G</b> |
| Olivo di Pancali                   | Modica                       | Ragusa          | 9           | F        |
| Olivo di Passo Parrino             | Modica                       | Ragusa          | 7.9         | G        |
| Olivo di Rossolillo 1              | Modica                       | Ragusa          | 9           | G        |
| Olivo di Rossolillo 2              | Modica                       | Ragusa          | 9.2         | F        |
| Olivo Sdraiato                     | Modica                       | Ragusa          | 4           | M        |
| Olivo di contrada Menta            | Ragusa                       | Ragusa          | 8.8         | F        |
| Olivo di San Giuseppe - Cavone     | Augusta                      | Siracusa        | 8           | M        |
| Olivo di Bochini 1                 | Avola                        | Siracusa        | 8           | F        |
| Olivo di Bochini 2                 | Avola                        | Siracusa        | 8           | G        |
| Olivo di Bochini 3                 | Avola                        | Siracusa        | 6           | F        |
| Olivo di Bochini 4                 | Avola                        | Siracusa        | 8           | M        |
| Olivo di Bochini 5                 | Avola                        | Siracusa        | 8           | G        |
| Olivo di Bochini 6                 | Avola                        | Siracusa        | 8.5         | G        |
| Olivo di Bochini 7                 | Avola                        | Siracusa        | 9.8         | M        |
| <b>Olivo di contrada La Gebbia</b> | <b>Avola</b>                 | <b>Siracusa</b> | <b>15.5</b> | <b>G</b> |
| Olivo di Meti                      | Avola                        | Siracusa        | 8           | G        |
| Olivo di Loco Grande 1             | Buccheri                     | Siracusa        | 10.3        | F        |
| Olivo di Loco Grande 2             | Buccheri                     | Siracusa        | 11.9        | F        |
| Olivo di Loco Monaco               | Buccheri                     | Siracusa        | 8.8         | E        |
| Olivo di Sacramento 1              | Buccheri                     | Siracusa        | 7           | G        |
| Olivo di Sacramento 2              | Buccheri                     | Siracusa        | 8.3         | G        |
| <b>Olivo di Sacramento 3</b>       | <b>Buccheri</b>              | <b>Siracusa</b> | <b>8.5</b>  | <b>F</b> |

|                                    |                                |                 |             |          |
|------------------------------------|--------------------------------|-----------------|-------------|----------|
| Olivo di Sant'Andrea               | Buccheri                       | Siracusa        | 11.7        | E        |
| Olivo di Zocco-Venera 1            | Buccheri                       | Siracusa        | 8           | G        |
| Olivo di Zocco-Venera 2            | Buccheri                       | Siracusa        | 7           | F        |
| Olivo di Zocco-Venera 3            | Buccheri                       | Siracusa        | 9.5         | F        |
| <b>Olivo di Zocco-Venera 4</b>     | <b>Buccheri</b>                | <b>Siracusa</b> | <b>9.7</b>  | <b>G</b> |
| Olivo di Zocco-Venera 5            | Buccheri                       | Siracusa        | 6           | G        |
| <b>Olivo di Garofalo</b>           | <b>Canicattini Bagni</b>       | <b>Siracusa</b> | <b>6.3</b>  | <b>F</b> |
| Olivi di Busulmone (11 trees)      | Noto                           | Siracusa        | 5–9         | F        |
| Olivo di Alfano                    | Noto                           | Siracusa        | 6.5         | M        |
| Olivo di Benesiti                  | Noto                           | Siracusa        | 6           | M        |
| <b>Olivo di Busulmone</b>          | <b>Noto</b>                    | <b>Siracusa</b> | <b>12.6</b> | <b>E</b> |
| Olivo di Candelaro                 | Noto                           | Siracusa        | 6.2         | F        |
| Olivo di Fonte Rosano              | Noto                           | Siracusa        | 6           | M        |
| Olivo di Gaetanì                   | Noto                           | Siracusa        | 16          | F        |
| Olivo di Banco 1                   | Palazzolo Acreide              | Siracusa        | 4.6         | G        |
| Olivo di Banco 2                   | Palazzolo Acreide              | Siracusa        | 3.6         | F        |
| Olivo di Banco 3                   | Palazzolo Acreide              | Siracusa        | 3.2         | M        |
| Olivo di Banco 4                   | Palazzolo Acreide              | Siracusa        | 3.9         | F        |
| Olivo di Falabia 1                 | Palazzolo Acreide              | Siracusa        | 4.4         | M        |
| Olivo di Falabia 2                 | Palazzolo Acreide              | Siracusa        | 6.2         | F        |
| <b>Olivo di Falabia 3</b>          | <b>Palazzolo Acreide</b>       | <b>Siracusa</b> | <b>6.9</b>  | <b>G</b> |
| Olivo di Falabia 4                 | Palazzolo Acreide              | Siracusa        | 6.1         | F        |
| Olivo di Falabia 5                 | Palazzolo Acreide              | Siracusa        | 5           | F        |
| Olivo di Furmica                   | Palazzolo Acreide              | Siracusa        | 5.4         | F        |
| Olivo di Monte Climiti             | Priolo Gargallo                | Siracusa        | 5           | F        |
| Olivo di Morghella                 | Priolo Gargallo                | Siracusa        | 8           | G        |
| Olivo di Puliga                    | Priolo Gargallo                | Siracusa        | 6           | G        |
| Olivastro Spiralato di Favarotta   | Rosolini                       | Siracusa        | 3.8         | M        |
| Olivo di Carancino                 | Siracusa                       | Siracusa        | 5           | F        |
| Olivo di Tremilia di Sotto         | Siracusa                       | Siracusa        | 10          | F        |
| <b>Olivo di Fraginesi 1</b>        | <b>Castellammare del Golfo</b> | <b>Trapani</b>  | <b>13</b>   | <b>G</b> |
| Olivo di Fraginesi 2               | Castellammare del Golfo        | Trapani         | 12          | F        |
| Olivo di Fraginesi 3               | Castellammare del Golfo        | Trapani         | 9           | M        |
| Olivo di Canalotto                 | Castelvetrano                  | Trapani         | 4.7         | F        |
| Olivo di Latomie 1                 | Castelvetrano                  | Trapani         | 3.5         | F        |
| Olivo di Latomie 2                 | Castelvetrano                  | Trapani         | 3.9         | F        |
| Olivo di Marinella Cavallaro       | Castelvetrano                  | Trapani         | 4.2         | G        |
| <b>Olivo di Seggio</b>             | <b>Castelvetrano</b>           | <b>Trapani</b>  | <b>6.4</b>  | <b>G</b> |
| Olivo di Seggio-Sasinera           | Castelvetrano                  | Trapani         | 4.5         | F        |
| Olivo di Lenzi-Napola 2            | Erice                          | Trapani         | 6.4         | F        |
| Olivo di Lenzi-Napola 3            | Erice                          | Trapani         | 6.7         | F        |
| Olivo Secolare di Mokarta 1        | Erice                          | Trapani         | 11          | G        |
| <b>Olivo Secolare di Mokarta 2</b> | <b>Erice</b>                   | <b>Trapani</b>  | <b>11.3</b> | <b>G</b> |
| Olivo di Santa Maria               | Mazara del Vallo               | Trapani         | 4.8         | M        |
| Olivo di Ciafaglione 1             | Partanna                       | Trapani         | 5           | M        |
| Olivo di Ciafaglione 2             | Partanna                       | Trapani         | 3.6         | F        |
| Olivo di Biro 1                    | San Vito Lo Capo               | Trapani         | 4           | F        |
| Olivo di Biro 2                    | San Vito Lo Capo               | Trapani         | 4.8         | F        |
| Olivo di Castelluzzo 1             | San Vito Lo Capo               | Trapani         | 9           | G        |
| <b>Olivo di Castelluzzo 2</b>      | <b>San Vito Lo Capo</b>        | <b>Trapani</b>  | <b>9.5</b>  | <b>G</b> |
| <b>Olivo di Verdesca 1</b>         | <b>San Vito Lo Capo</b>        | <b>Trapani</b>  | <b>10</b>   | <b>F</b> |
| Olivo di Verdesca 2                | San Vito Lo Capo               | Trapani         | 5.7         | F        |
| Olivo di Verdesca 3                | San Vito Lo Capo               | Trapani         | 7           | F        |

---

|                         |                |                |            |          |
|-------------------------|----------------|----------------|------------|----------|
| Olivo di Lenzi-Napola 1 | Trapani        | Trapani        | 4          | F        |
| Olivo di Lenzi-Napola 4 | Trapani        | Trapani        | 3.5        | F        |
| Olivo di Milo 1         | Trapani        | Trapani        | 3.5        | G        |
| <b>Olivo di Milo 2</b>  | <b>Trapani</b> | <b>Trapani</b> | <b>7.5</b> | <b>E</b> |
| Olivo di Milo 3         | Trapani        | Trapani        | 4          | G        |
| Olivo di Milo 4         | Trapani        | Trapani        | 5          | F        |
| Olivo di Milo 5         | Trapani        | Trapani        | 5          | F        |

---

\* E = excellent, G = good, F = fair, M = mediocre, P = poor.
